# Supplementary material for: Y Chromosomes of 40% Chinese Descend from Three Neolithic Super-Grandfathers
Source: PLoS One. 2014 Aug 29;9(8):e105691. doi: 10.1371/journal.pone.0105691 (PMC4149484; doi:10.1371/journal.pone.0105691)
Supplement: Table S4 — Comparison of SNPs discovered in this study and Wei et al. (2012). (XLS) [file pone.0105691.s007.xls]

## Sheet: S4 Comparison of SNP
Table S4 Comparison of SNPs discovered in this study and Wei et al. (2012)
		range	SNPs found in Wei et al. (2012)	density	SNPs found in this study	density
	only in this study	1294834			1172	0.000905
	only by Wei	6360717	4136	0.00065
	Wei and this study	2604212	1551	0.000596	2371	0.00091
